# Supplementary material
Source: PubMed Central journal article supplement (PMC7611248)
Supplement: EMS128842-supplement-Supplementary_material.pdf [file EMS128842-supplement-Supplementary_material.pdf]

# **Repression of the Type I Interferon pathway underlies MYC & KRAS-dependent evasion of NK & B cells in Pancreatic Ductal Adenocarcinoma**

Nathiya Muthalagu<sup>1</sup>, Tiziana Monteverde<sup>2</sup>, Ximena Raffo-Iraolagoitia<sup>1</sup>, Robert Wiesheu<sup>2</sup>, Declan Whyte<sup>2</sup>, Ann Hedley<sup>1</sup>, Sarah Laing<sup>2</sup>, Björn Kruspig<sup>2</sup>, Rosanna Upstill-Goddard<sup>3</sup>, Robin Shaw<sup>1</sup>, Sarah Neidler<sup>2</sup>, Curtis Rink<sup>1</sup>, Saadia A. Karim<sup>1</sup>, Katarina Gyuraszova<sup>2</sup>, Colin Nixon<sup>1</sup>, William Clark<sup>1</sup>, Andrew V. Biankin<sup>3</sup>, Leo M. Carlin<sup>1,2</sup>, Seth B. Coffelt<sup>1,2</sup>, Owen J. Sansom<sup>1,2</sup>, Jennifer P. Morton<sup>1\*</sup> & Daniel J. Murphy<sup>1,2\*</sup>

## **Summary of Supplementary Materials:**

**Supplementary Figures 1-6**

**Supplementary Tables 1-3**

**Supplementary Table S4 (provided as a separate Excel file)**

**Detailed RNA-SEQ Materials & Methods**

**Supplementary References**

Figure S1

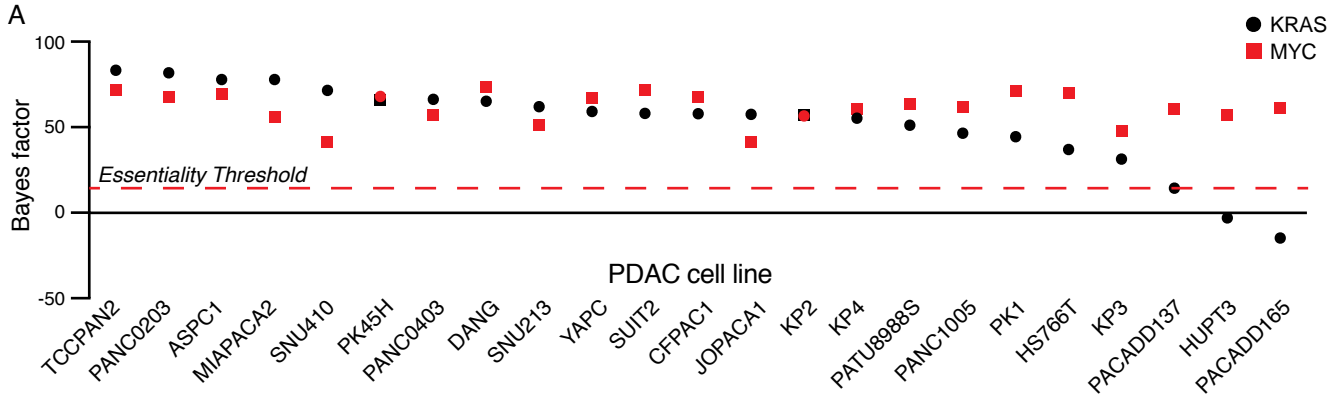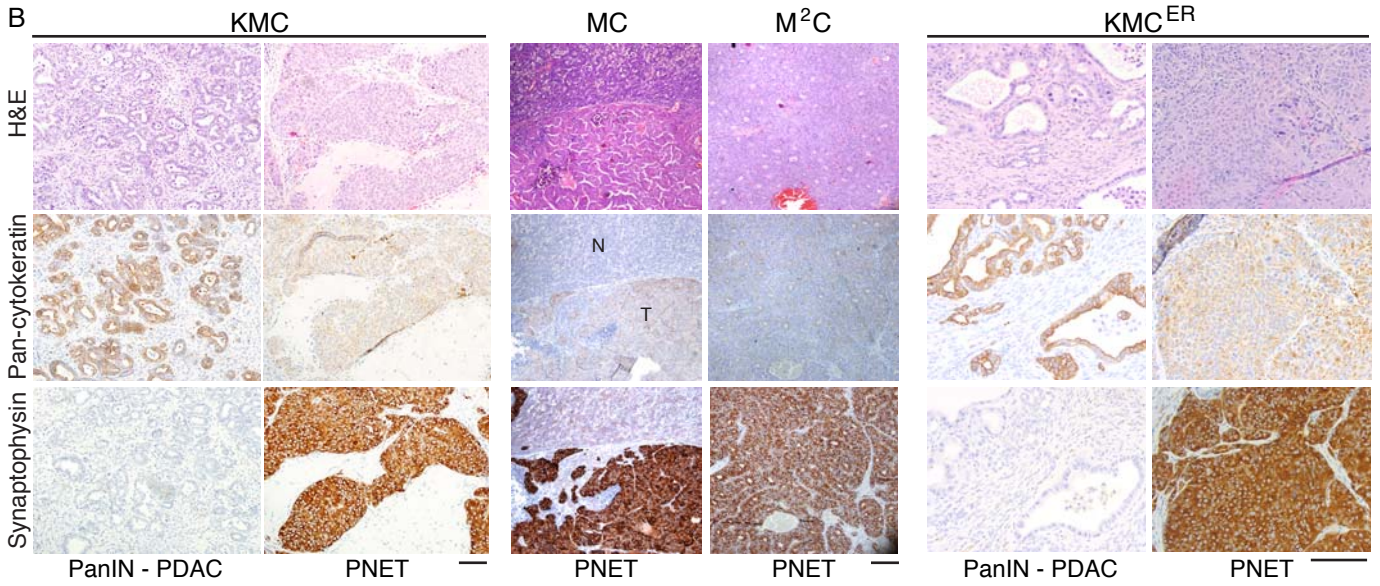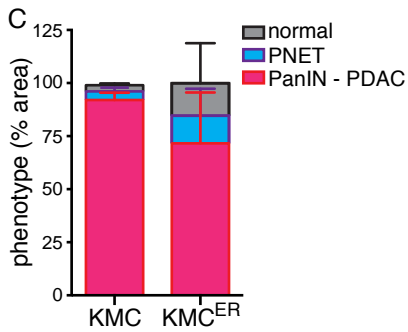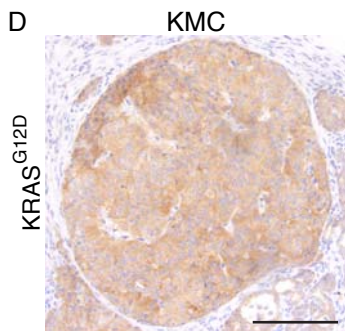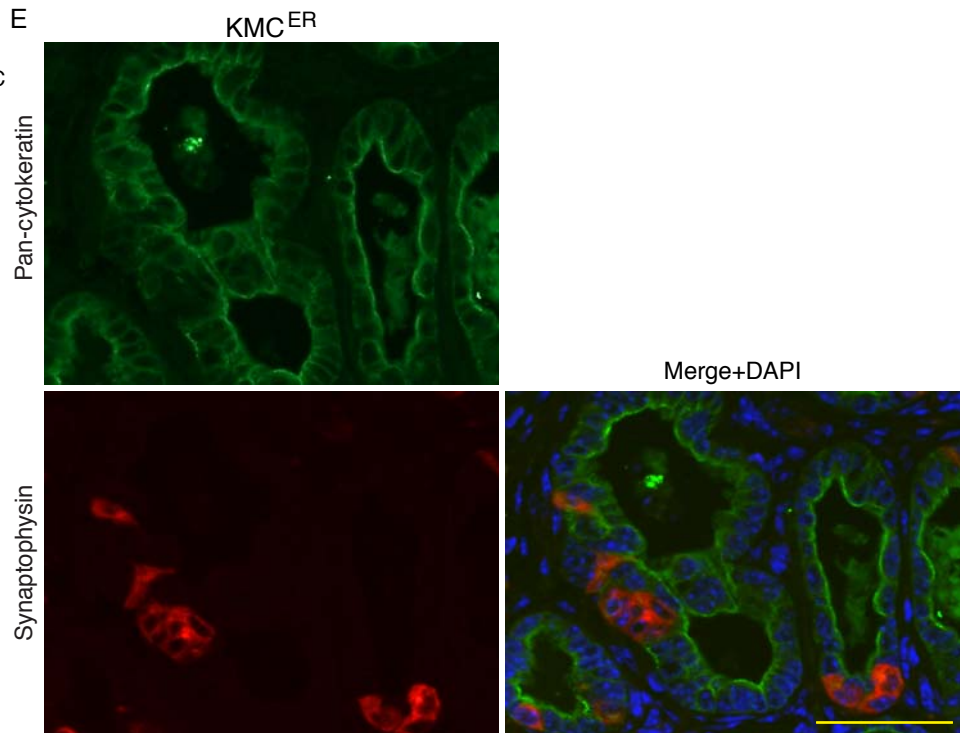

**Figure S1: Characterization of MYC-driven pancreatic tumour phenotypes**

**A)** Meta-analysis of CRISPR deletion of *KRAS* or *c-MYC* in human PDAC cell lines using the Avana 2018 gRNA library, generated using the PICKLES database: <https://hartlab.shinyapps.io/pickles/>. A Bayes factor >5 indicates essentiality of each gene for the indicated cell line. **B)** Histological characterization of tumours in mice of the indicated genotypes. For KMC and KMC<sup>ER</sup>, representative images of both ductal epithelial lesions and neuroendocrine tumour areas are shown. N = normal pancreas; T = tumour. Scale bars = 100µm. **C)** Quantification of tumour area showing features of PanIN-PDAC versus PNET or normal tissue in KMC (N=11) and KMC<sup>ER</sup> (N=10) mice. **D)** IHC staining with KRas<sup>G12D</sup>-specific antibody shows expression of mutant KRAS in an area of PNET. Scale bar = 1000 µM. **E)** Immunofluorescent detection of cytokeratin and synaptophysin double-positive cells in KMC<sup>ER</sup> tumour tissue. Scale bar = 50 µM.

Figure S2

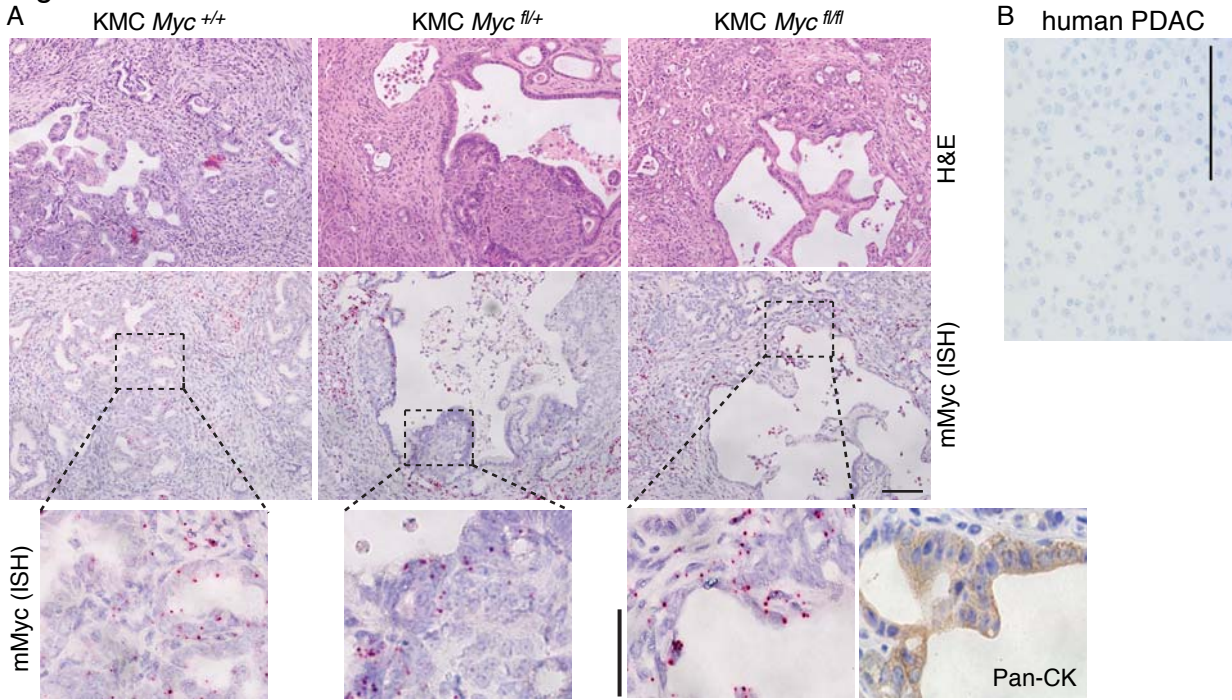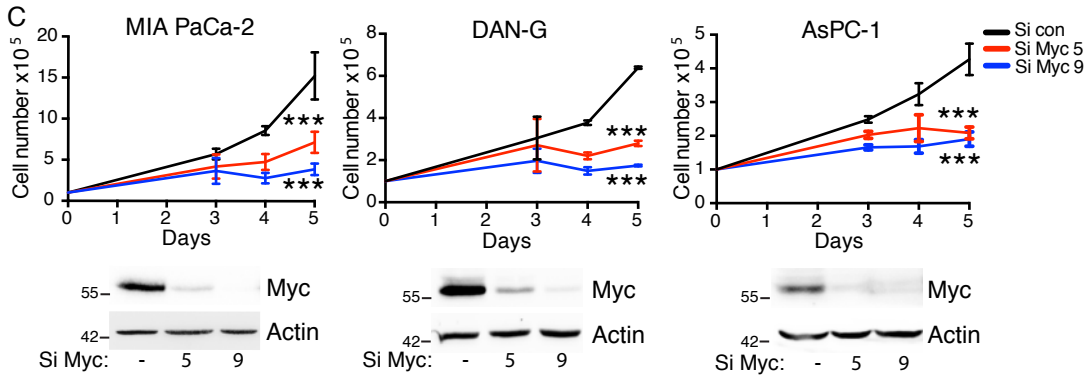

**Figure S2: Expression of endogenous c-Myc is required for KMC PDAC development**

**A)** *In situ* hybridization for murine *c-Myc* in PDAC from KMC, KMC-*cMyc*<sup>fl/+</sup> and KMC-*cMyc*<sup>fl/fl</sup> mice (red stain). Note the retention of expression in ductal epithelium of KMC-*cMyc*<sup>fl/fl</sup> tumours. Scale bars = 100µm (main panels) and 50µm (zoomed insets). **B)** ISH staining of a section of human PDAC using the same murine *c-Myc*-specific probe as in (A). Scale bar = 100µm. **C)** Cell propagation measurement upon depletion of MYC in 3 human PDAC cells lines using either of 2 siRNAs. N=3 independent experiments. \*\*\* denotes p<0.001 (ANOVA, Dunnett's multiple comparisons test). Lower panels: Immunoblots confirm MYC depletion.

Figure S3

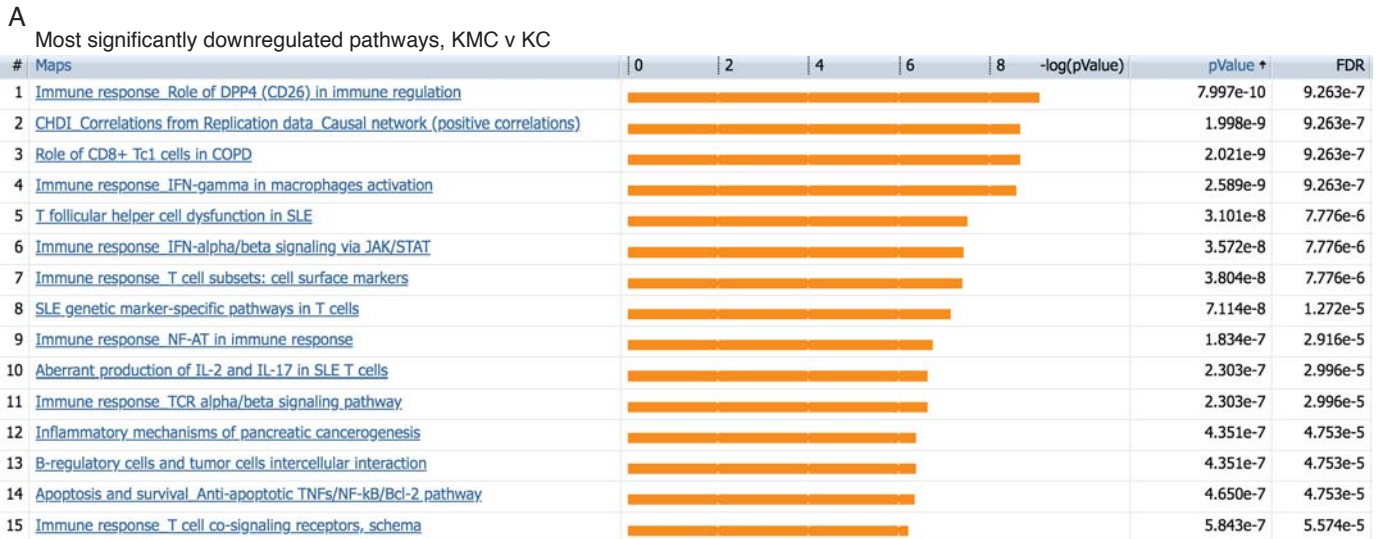

**Figure S3: MYC levels modulate the immune landscape in PDAC**

Metacore GeneGO analysis of RNA SEQ data from KC (N=6) versus KMC (N=6) tumours, showing the top 15 most significantly downregulated pathways in KMC, relative to KC PDAC tumours. FDR = false discovery rate.

Pathway annotations current as of January 2020.

Figure S4

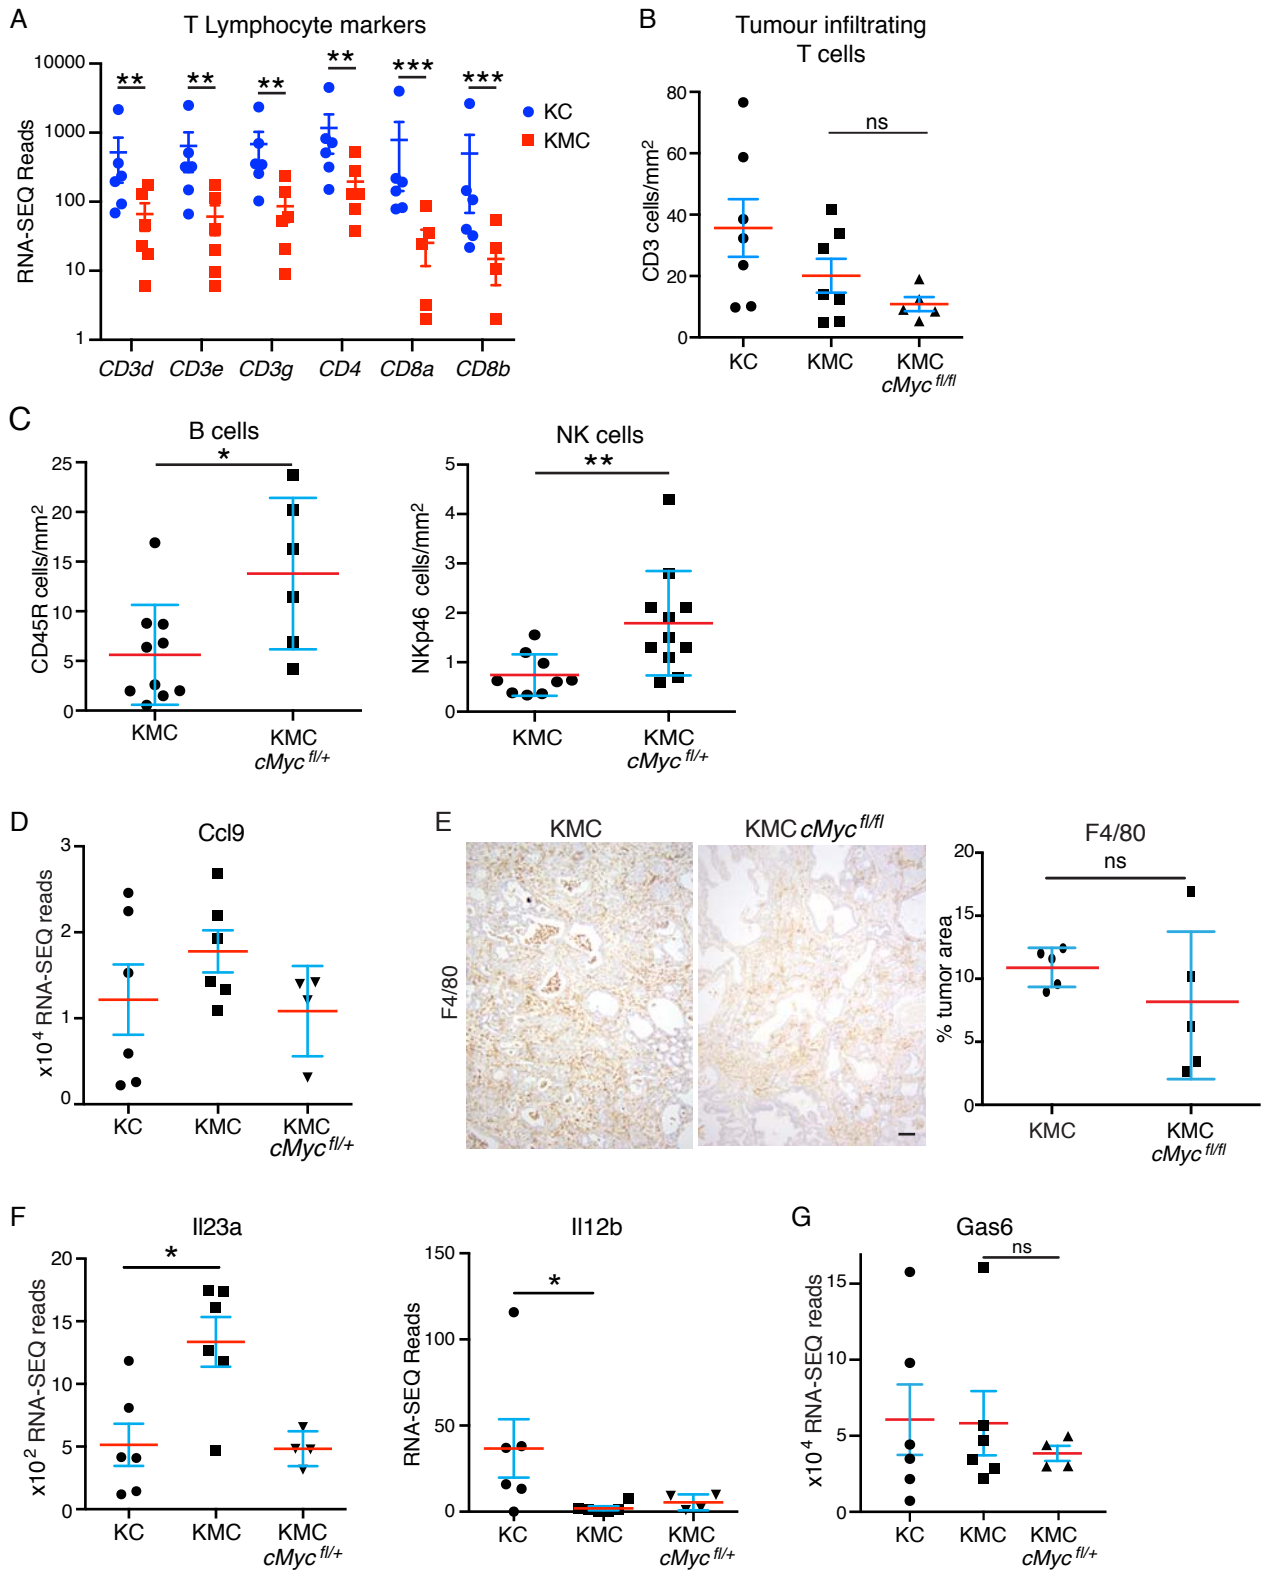



**Figure S4: Previously described mechanisms fail to account for long-term effects of MYC on the immune landscape of PDAC**

**A)** RNA-SEQ analysis of T lymphocyte gene expression in KC (N=6) versus KMC tumours (N=6). Mean and SEM values shown (panels A-G). Note that samples with zero reads are omitted from log scale graphics (pertains only to KMC samples). **B)** IHC quantification of CD3-positive T cell tumour infiltration in KC (N=7), KMC (N=7) and KMC-*Myc<sup>fl/fl</sup>* (N=5) PDAC; ns = not significant, Kruskal-Wallis and Dunn's multiple comparison test. **C)** IHC quantification of CD45R-positive B and NKp46-positive NK cell tumour infiltration in KMC versus KMC-*Myc<sup>fl/+</sup>* PDAC. \* denotes P<0.05, \*\* denotes P<0.01. Mann-Whitney test. **D)** RNA-SEQ analysis of *Ccl9* expression in KC (N=6), KMC (N=6) and KMC-*Myc<sup>fl/+</sup>* (N=4) PDAC. **E)** IHC quantification of F4/80 positive macrophage infiltration, measured as % tumour area, in KMC (N=5) versus KMC-*Myc<sup>fl/fl</sup>* (N=5) PDAC. Scale bar = 100µm; ns = not significant, Mann-Whitney test. **F)** RNA-SEQ analysis of IL23 subunit expression in KC (N=6), KMC (N=6) and KMC-*Myc<sup>fl/+</sup>* (N=4) PDAC. \* denotes P<0.05. ANOVA and post-hoc Tukey test. **G)** RNA-SEQ analysis of Gas6 expression in KC (N=6), KMC (N=6) and KMC-*Myc<sup>fl/+</sup>* (N=4) PDAC. ANOVA and post-hoc Tukey test; ns = not significant.

Figure S5

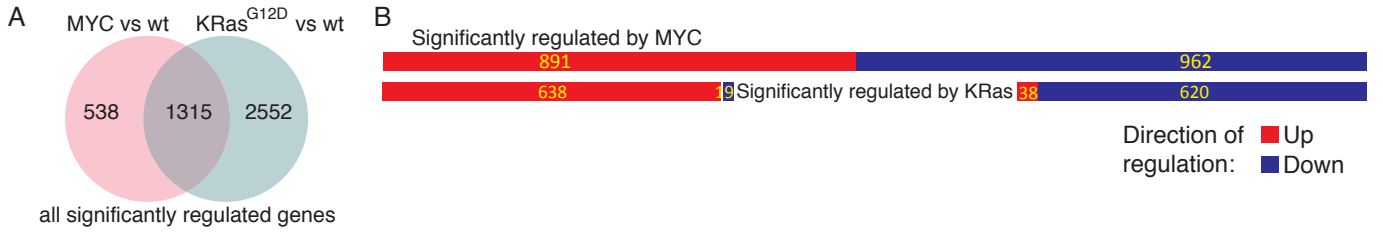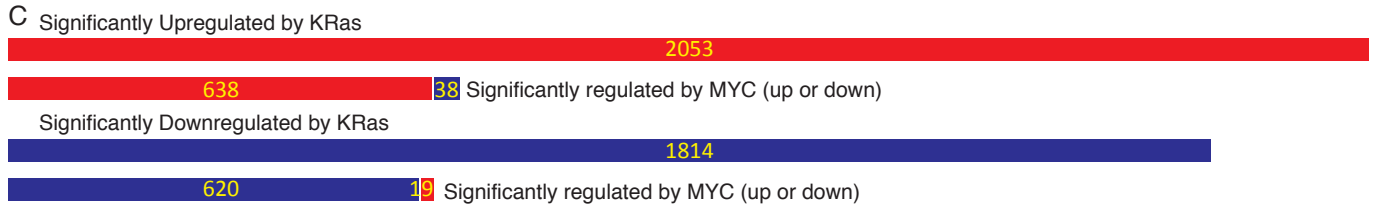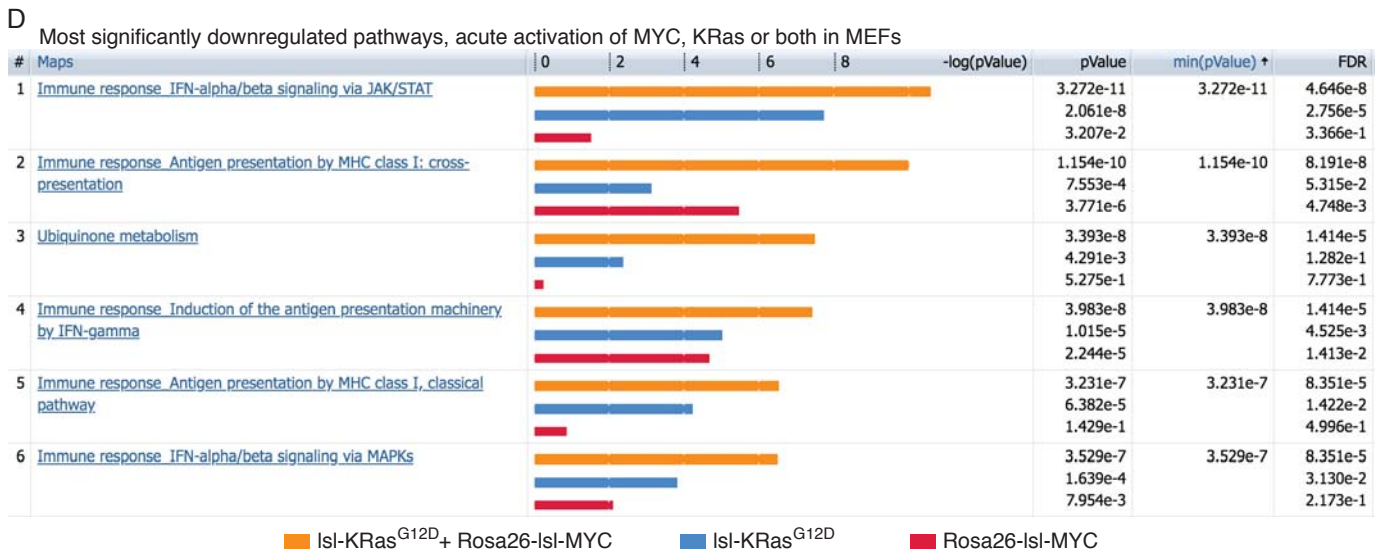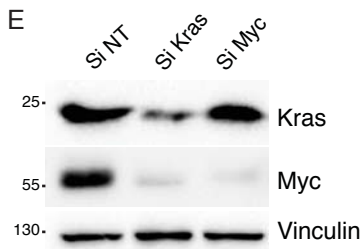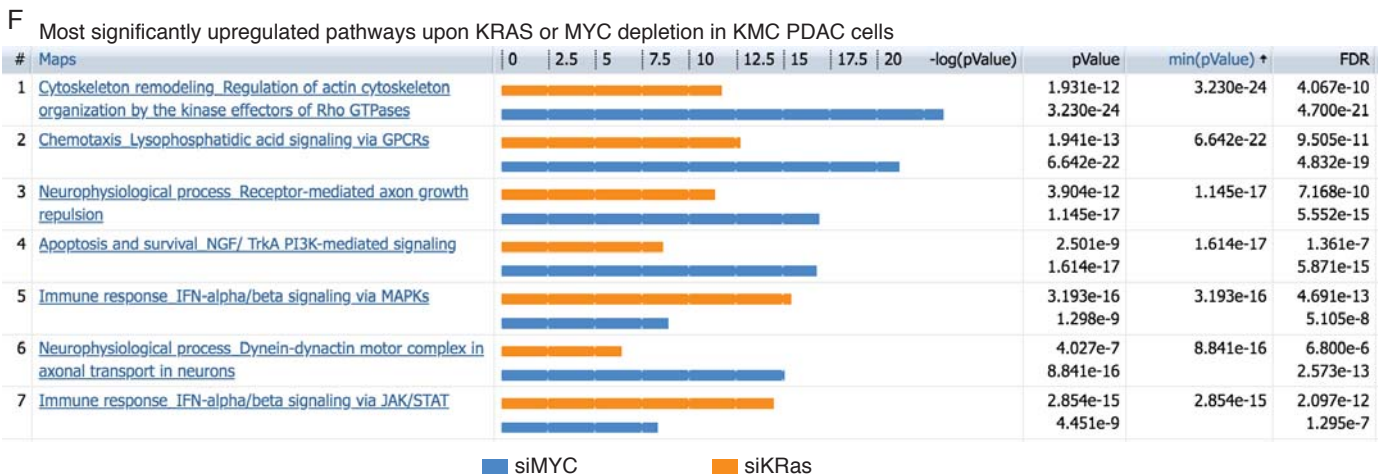

**Figure S5: Coordinate regulation of gene expression by KRAS and MYC in PDAC & MEFs**

**A)** Summary of RNA-SEQ analysis showing overlap in significantly altered gene expression (irrespective of direction or magnitude change), relative to control infected MEFs, upon acute CRE-mediated activation of *Isl-KRas<sup>G12D</sup>* and *Rosa26<sup>DM-Isl-MYC</sup>* alleles. Numbers indicate the number of significantly regulated genes. **B)** Co-directional gene regulation of MYC-regulated genes upon activation of KRas<sup>G12D</sup>, as per (A). Numbers indicate the number of significantly regulated genes. **C)** Co-directional regulation of KRas<sup>G12D</sup>-regulated genes upon expression of Rosa26-driven MYC, as per (B). **D)** Metacore GeneGO analysis of the most significantly down-regulated pathways upon activation of *Isl-KRas<sup>G12D</sup>*, *Rosa26<sup>DM-Isl-MYC</sup>* or both in MEFs. Coloured bars indicate p values (-log). **E)** Immunoblots showing depletion of MYC and KRAS in KMC PDAC tumour cells treated with the indicated siRNAs. **F)** Metacore GeneGO analysis of RNA-SEQ data from KMC PDAC tumour cells upon siRNA-mediated depletion of MYC (N=4) or KRas (N=4) *in vitro*. MYC was depleted using pooled siRNA targeting both human and murine *c-MYC*.

Figure S6

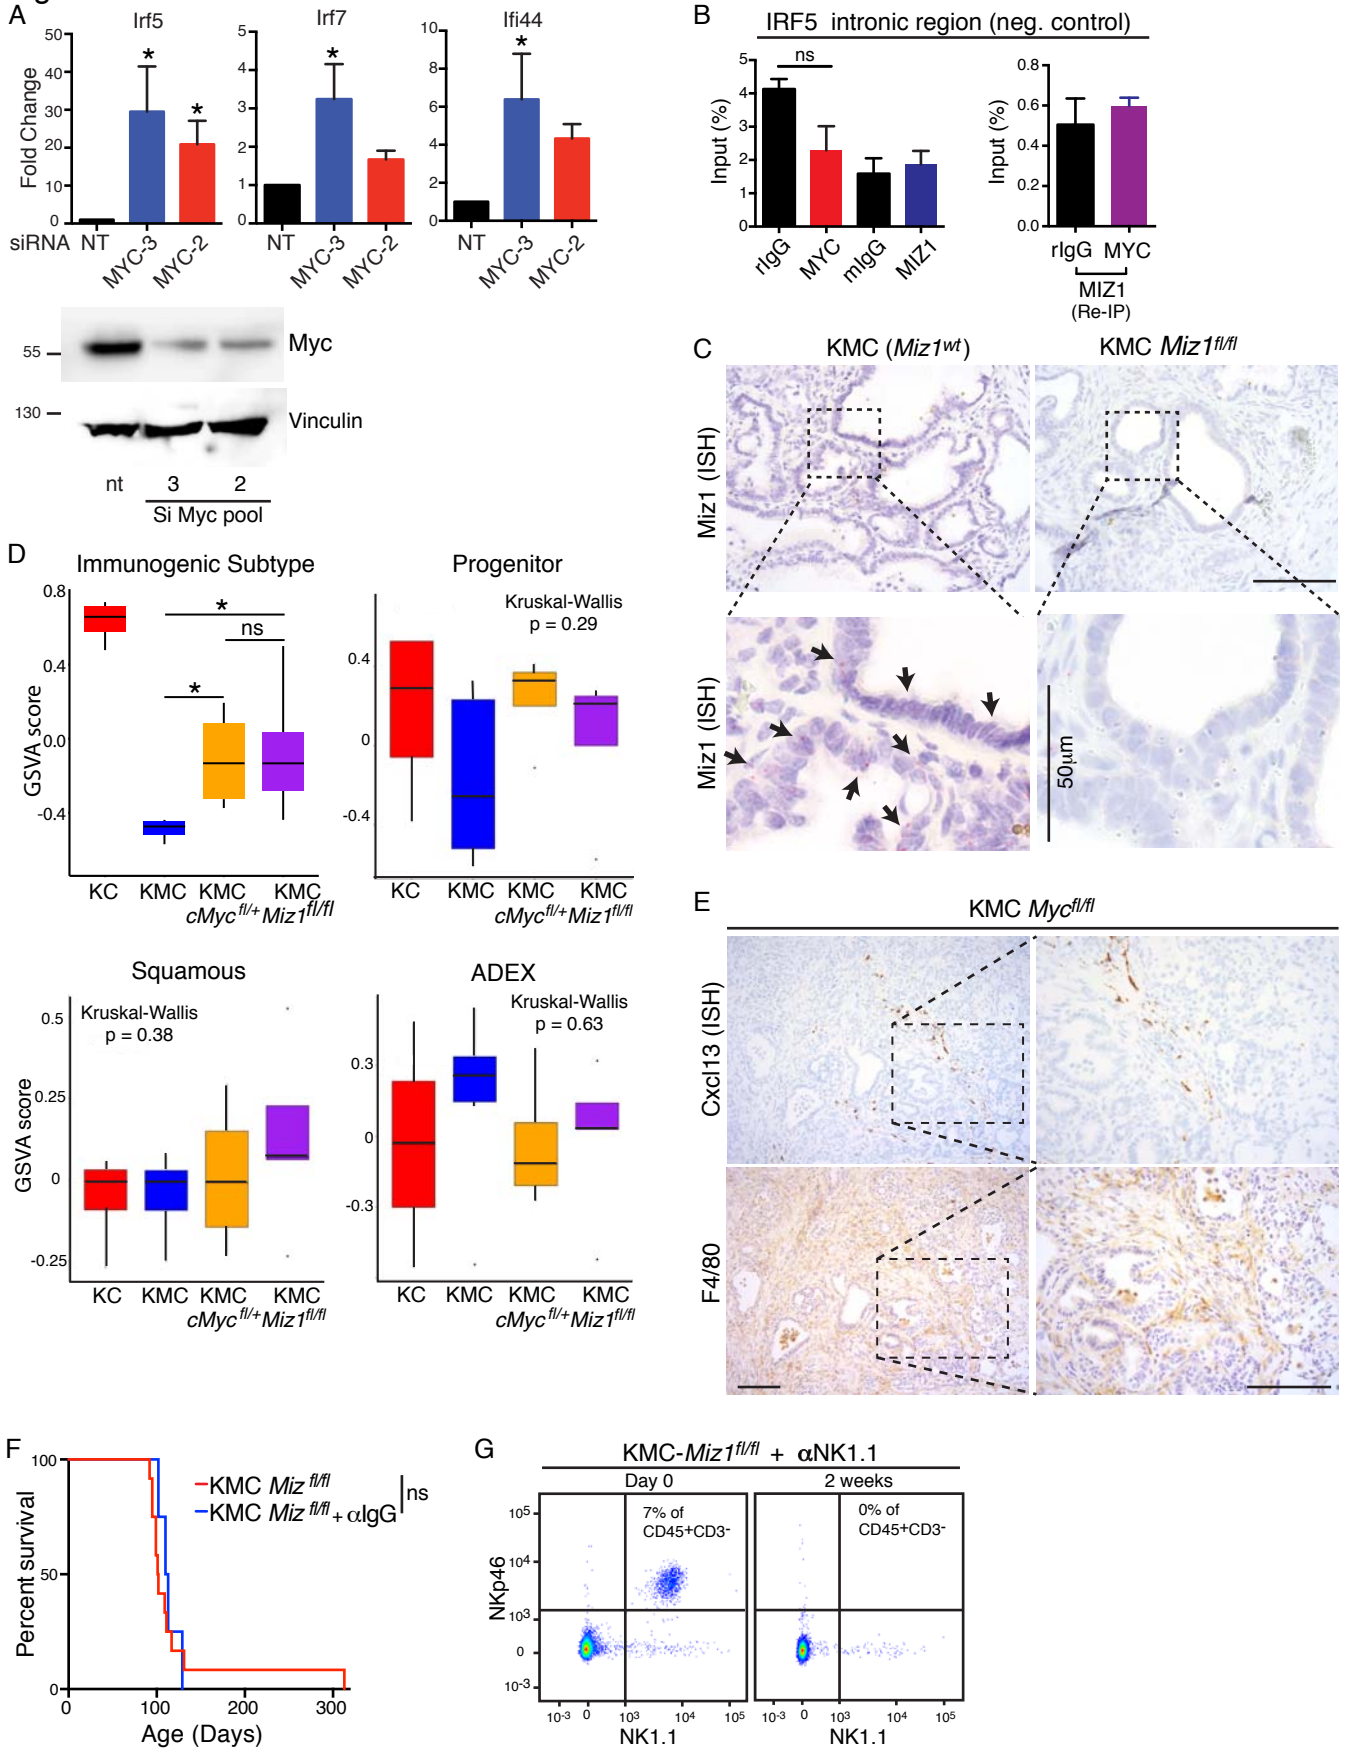

**Figure S6: The role of Miz1 in MYC-dependent suppression of the immune landscape**

**A)** Q-PCR analysis of expression of indicated genes in KMC PDAC cells upon depletion of MYC (human & murine) with either of 2 pools of siRNA. Mean and SEM of 3 independent experiment shown. \* denotes  $P < 0.05$ , ANOVA and Fisher's LSD test. Immunoblot (right panel) confirms MYC depletion. **B)** Chromatin immunoprecipitation (ChIP) and ChIP-re-ChIP analysis of MYC and MIZ1 binding to an intronic region of the human IRF5 locus in DAN-G cells. Mean and SEM of technical replicates from 1 of 3 independent experiments shown; ns= not significant, ANOVA and Tukey's multiple comparison test. **C)** ISH analysis showing effective deletion of *Miz1* in KMC-*Miz1*<sup>fl/fl</sup> PDAC ductal epithelium. **D)** PDAC subtype analysis performed as per Bailey et al. (1) showing the impact of *c-Myc* or *Miz1* deletion in KMC tumours upon the murine equivalent of the human "immunogenic" subtype but none of the other three subtype gene signatures. Data derived from RNA-SEQ analysis of tumours from the indicated genotypes. \* denotes  $P < 0.05$ , Kruskal-Wallis and Dunn's multiple comparison test. **E)** Expression of *Cxcl13* detected in KMC-*Myc*<sup>fl/fl</sup> PDAC tumours by ISH. Lower panels show F4/80 IHC. Scale bars = 50 $\mu$ m. **F)** Survival analysis upon treatment of KMC-*Miz1*<sup>fl/fl</sup> tumour-bearing mice with Goat IgG isotype control for anti-Cxcl13 (N=4) versus no treatment (N=12). **G)** Representative FACS analysis of whole blood from KMC *Miz1*<sup>fl/fl</sup> mouse before or after 2 weeks treatment with NK1.1 depleting antibody. N = 3.









**Table S2: Significantly regulated by KRas<sup>G12D</sup> in MEFs**

Table shows RNA-SEQ reads for each gene significantly regulated by more than 2 fold upon activation of Isl-KRas<sup>G12D</sup> allele for 24hrs in primary MEFs. Comparison is with identically treated passage-matched wild-type MEFs. FC = fold change, numbers >2 in red, <-2 in dark blue. Adjusted p values <0.05 shown in red. Also shown are RNA-SEQ reads for the same genes upon similar activation of Rosa26<sup>DM-Isl-MYC</sup>, compared with wt MEFs, using the same colour scheme, plus FC>1.5 in pink; <-1.5 in light blue, to highlight convergent and divergent gene expression.

**Muthalagu et al. Table S3: Significantly regulated by KRasG12D+Rosa26-DM-MYC in MEFs**

| gene_name                                                                               | symbol     | Mean WT    | Mean MycKras | FC         | padj       |
|-----------------------------------------------------------------------------------------|------------|------------|--------------|------------|------------|
| aggrecan                                                                                | Acan       | 43.2824021 | 660.527155   | 8.72130989 | 4.3253E-84 |
| glucosaminyl (N-acetyl) transferase 1, core 2                                           | Gcnt1      | 27.7489748 | 196.0805209  | 4.54473728 | 1.1057E-31 |
| gap junction protein, beta 2                                                            | Gjb2       | 466.955423 | 2364.985825  | 4.4734454  | 2.0759E-69 |
| chemokine (C-X-C motif) ligand 3                                                        | Cxcl3      | 8.98697059 | 94.71136401  | 4.04589344 | 2.8361E-22 |
| elastin                                                                                 | Eln        | 45.1426709 | 439.011641   | 4.02905949 | 2.2919E-19 |
| early growth response 1                                                                 | Egr1       | 119.989019 | 767.9263895  | 4.00565515 | 6.2083E-25 |
| CAP-GLY domain containing linker protein family, member 4                               | Clip4      | 47.8791174 | 254.6629093  | 3.83665229 | 2.5113E-31 |
| BarH-like homeobox 1                                                                    | Barx1      | 1.82270046 | 54.87072145  | 3.61275007 | 2.339E-16  |
| integrin alpha 2                                                                        | Itga2      | 403.501296 | 1888.796944  | 3.50096975 | 2.8319E-24 |
| paired-like homeodomain transcription factor 1                                          | Pitx1      | 57.4823739 | 245.0427559  | 3.22606801 | 1.9355E-21 |
| solute carrier family 4 (anion exchanger), member 4                                     | Slc4a4     | 416.774414 | 1391.747637  | 3.13830216 | 1.9212E-58 |
| pro-platelet basic protein                                                              | Ppbb       | 281.783911 | 952.7617401  | 3.05332845 | 2.8675E-33 |
| nuclear receptor subfamily 1, group H, member 5                                         | Nr1h5      | 14.0005099 | 88.86336074  | 3.02592418 | 1.2637E-12 |
| ATPase, H <sup>+</sup> transporting, lysosomal V0 subunit E2                            | Atp6v0e2   | 39.8441402 | 154.8247926  | 2.95212193 | 6.3004E-17 |
| chemokine (C-X-C motif) ligand 12                                                       | Cxcl12     | 1184.25058 | 3660.38941   | 2.84973329 | 1.4587E-37 |
| angiopoietin-like 7                                                                     | Angptl7    | 16.4852509 | 89.58234157  | 2.61277018 | 1.5142E-11 |
| plakophilin 1                                                                           | Pkp1       | 247.243603 | 735.1157984  | 2.79493142 | 8.5981E-34 |
| S100 calcium binding protein A16                                                        | S100a16    | 194.164971 | 610.8912967  | 2.76495743 | 3.9614E-26 |
| complement component 1, s subcomponent 1                                                | C1s1       | 20.503079  | 92.90708547  | 2.67849947 | 3.9917E-11 |
| matrix metalloproteinase 3                                                              | Mmp3       | 136.749548 | 388.1413648  | 2.61628812 | 4.5829E-22 |
| insulin-like growth factor 2                                                            | Igf2       | 912.105521 | 2743.793326  | 2.6156507  | 3.0533E-18 |
| solute carrier family 14 (urea transporter), member 1                                   | Slc14a1    | 43.1917414 | 142.279444   | 2.55847704 | 4.7713E-11 |
| solute carrier family 29 (nucleoside transporters), member 2                            | Slc29a2    | 231.60392  | 693.2518481  | 2.5161548  | 7.7344E-15 |
| protein tyrosine phosphatase, non-receptor type 13                                      | Ptpn13     | 2319.43332 | 6292.845664  | 2.47729156 | 6.2862E-23 |
| chemokine (C-X-C motif) ligand 5                                                        | Cxcl5      | 326.105364 | 1015.029521  | 2.46134975 | 1.2897E-11 |
| 5' nucleotidase, ecto                                                                   | Nt5e       | 364.391148 | 948.3364829  | 2.4534367  | 2.5556E-43 |
| neuronal cell adhesion molecule                                                         | Nrcam      | 154.069126 | 405.2908065  | 2.45275411 | 1.0552E-22 |
| solute carrier family 17 (sodium-dependent inorganic phosphate cotransporter), member 6 | Slc17a6    | 21.3287104 | 72.05974685  | 2.44233379 | 8.5243E-09 |
| TraB domain containing 2B                                                               | Trabd2b    | 108.71626  | 323.800266   | 2.4268601  | 6.4063E-12 |
| peptidase inhibitor 15                                                                  | Pi15       | 300.065366 | 772.8549345  | 2.40254069 | 3.5911E-25 |
| leucine rich repeat transmembrane neuronal 2                                            | Lrrtm2     | 157.096374 | 452.4045032  | 2.39798828 | 2.4869E-12 |
| angiotensin II receptor, type 2                                                         | Agtr2      | 15.7793228 | 63.09436434  | 2.37747528 | 6.8206E-09 |
| unc-13 homolog C (C. elegans)                                                           | Unc13c     | 166.588113 | 446.5198225  | 2.3726152  | 3.0654E-20 |
| E2F transcription factor 8                                                              | E2f8       | 446.019925 | 1282.780131  | 2.35597781 | 4.5548E-11 |
| aristaless-like homeobox 3                                                              | Alx3       | 11.6796992 | 51.00408659  | 2.35214561 | 1.1618E-07 |
| collagen, type XIV, alpha 1                                                             | Col14a1    | 356.822992 | 997.6342172  | 2.3360876  | 1.1259E-11 |
| neuronal guanine nucleotide exchange factor                                             | Ngef       | 110.62466  | 290.5733401  | 2.31492917 | 7.6643E-14 |
| HtraA serine peptidase 3                                                                | Htra3      | 128.55064  | 395.6963846  | 2.31208268 | 1.2681E-08 |
| alanyl (membrane) aminopeptidase                                                        | Anpep      | 16.1140118 | 78.06614769  | 2.30063755 | 4.7562E-07 |
| dynactin associated protein                                                             | Dynap      | 135.395406 | 355.4514782  | 2.3001447  | 1.8935E-15 |
| anoctamin 1, calcium activated chloride channel                                         | Ano1       | 510.991344 | 1282.927235  | 2.29657399 | 3.222E-21  |
| inositol polyphosphate-4-phosphatase, type II                                           | Inpp4b     | 38.647779  | 128.9562996  | 2.29337157 | 9.4866E-09 |
| interleukin 11                                                                          | Il11       | 361.891052 | 865.667004   | 2.28880643 | 9.2992E-26 |
| mesothelin                                                                              | Msln       | 94.8803598 | 235.8996116  | 2.27843511 | 1.9754E-14 |
| transcription factor AP4                                                                | Tfap4      | 219.96692  | 541.1771647  | 2.27088676 | 1.5009E-19 |
| BTB (POZ) domain containing 11                                                          | Btbd11     | 395.548323 | 974.1622865  | 2.26804115 | 1.6953E-22 |
| secreted phosphoprotein 1                                                               | Spp1       | 8558.83351 | 20824.18223  | 2.2642879  | 5.0037E-20 |
| uncoupling protein 2 (mitochondrial, proton carrier)                                    | Ucp2       | 367.949283 | 932.1181487  | 2.23283864 | 2.3911E-13 |
| lumican                                                                                 | Lum        | 63.0348167 | 170.3432406  | 2.21496348 | 3.8988E-09 |
| RIKEN cDNA 1700012B09 gene                                                              | 1700012B09 | 35.7824245 | 99.24117258  | 2.20652483 | 4.9675E-08 |
| collagen, type XV, alpha 1                                                              | Col15a1    | 181.236837 | 488.6881144  | 2.20494558 | 3.3312E-09 |
| aquaporin 1                                                                             | Aqp1       | 1619.79319 | 3686.133335  | 2.20375796 | 5.4711E-42 |
| high mobility group AT-hook I, related sequence 1                                       | Hmga1-rs1  | 5094.28082 | 11675.17447  | 2.20318228 | 7.5195E-31 |
| tropomodulin 2                                                                          | Tmod2      | 264.580741 | 637.6939635  | 2.20010036 | 2.8043E-17 |
| expressed sequence AI854703                                                             | AI854703   | 7.08230498 | 30.85897026  | 2.18256861 | 4.8729E-06 |
| potassium voltage-gated channel, subfamily Q, member 5                                  | Kcnq5      | 215.999978 | 517.1273532  | 2.18213624 | 4.8225E-22 |
| ribosomal protein L35A                                                                  | Rpl35a     | 262.829783 | 628.5910554  | 2.16756141 | 1.1815E-13 |
| fibroblast growth factor 10                                                             | Fgf10      | 436.392758 | 1040.427576  | 2.15730709 | 4.9993E-15 |
| protein tyrosine phosphatase, non-receptor type 22 (lymphoid)                           | Ptpn22     | 18.5545258 | 58.72308617  | 2.15492829 | 1.1384E-06 |
| SRY (sex determining region Y)-box 2                                                    | Sox2       | 1.7407353  | 31.27556278  | 2.13456412 | 1.0552E-05 |
| treacle ribosome biogenesis factor 1                                                    | Tcof1      | 1426.34483 | 3515.810541  | 2.13369332 | 6.505E-10  |
| neuronal pentraxin 1                                                                    | Nptx1      | 62.2079972 | 154.9921632  | 2.1292723  | 1.7548E-09 |
| heparan sulfate (glucosamine) 3-O-sulfotransferase 1                                    | Hs3st1     | 33.797491  | 96.35717858  | 2.11674296 | 2.4426E-07 |
| solute carrier organic anion transporter family, member 2a1                             | Slco2a1    | 706.396386 | 1682.816281  | 2.10184339 | 1.296E-10  |
| family with sequence similarity 84, member A                                            | Fam84a     | 57.7738543 | 138.6790084  | 2.07393404 | 9.1553E-08 |
| paired-like homeodomain transcription factor 2                                          | Pitx2      | 35.3300689 | 93.12904054  | 2.07171447 | 1.786E-07  |
| suprabasin                                                                              | Sbsn       | 275.542252 | 605.1940891  | 2.06599509 | 1.5494E-16 |
| cDNA sequence BC048403                                                                  | BC048403   | 95.9687685 | 286.4009379  | 2.05846599 | 8.9413E-06 |
| immunoglobulin superfamily, DCC subclass, member 4                                      | Igdcc4     | 164.432421 | 392.1430876  | 2.05313107 | 3.1167E-09 |
| delta-like 1 homolog (Drosophila)                                                       | Dlk1       | 903.19726  | 2256.644499  | 2.04900392 | 3.7725E-07 |
| autism susceptibility candidate 2                                                       | Auts2      | 184.062926 | 442.3620265  | 2.04896119 | 1.0349E-08 |
| mitogen-activated protein kinase 6                                                      | Mapk6      | 9710.89006 | 21504.09072  | 2.03999985 | 1.6452E-12 |
| histone cluster 2, H4                                                                   | Hist2h4    | 548.593784 | 1238.962513  | 2.03180415 | 4.0673E-10 |
| histone H4                                                                              | LOC1026412 | 548.593784 | 1238.962513  | 2.03180415 | 4.0673E-10 |
| RIKEN cDNA D630045J12 gene                                                              | D630045J12 | 125.532936 | 295.9722922  | 2.02439498 | 8.5567E-08 |
| teneurin transmembrane protein 4                                                        | Tenm4      | 518.878455 | 1169.028293  | 2.01159066 | 7.2554E-10 |
| dual specificity phosphatase 5                                                          | Dusp5      | 1871.02166 | 3908.14032   | 2.00997903 | 9.0078E-22 |
| forkhead box G1                                                                         | Foxg1      | 178.634599 | 395.5432177  | 2.00713522 | 5.4451E-11 |
| elastin microfibril interfacier 2                                                       | Emilin2    | 1490.22016 | 3202.722406  | 2.00332407 | 4.0013E-13 |

|                                                                                             |             |            |             |            |            |
|---------------------------------------------------------------------------------------------|-------------|------------|-------------|------------|------------|
| proline arginine-rich end leucine-rich repeat family with sequence similarity 131, member A | Prelp       | 41.7037301 | 131.8208943 | 2.00052337 | 4.6195E-05 |
| integrin alpha 1                                                                            | Fam131a     | 137.008591 | 62.19531699 | -2.0037806 | 1.905E-09  |
| colony stimulating factor 3 (granulocyte)                                                   | Itga1       | 1202.2431  | 573.1027717 | -2.0046094 | 1.3395E-17 |
| sodium channel, voltage-gated, type IX, alpha                                               | Csf3        | 97.5283522 | 34.20659012 | -2.0107963 | 1.7073E-05 |
| apolipoprotein E                                                                            | Scn9a       | 26.2155482 | 3.238997904 | -2.0137925 | 1.6612E-05 |
| signal transducer and activator of transcription 2                                          | Apoe        | 227.811032 | 92.7521333  | -2.0183322 | 3.2224E-07 |
| relaxin family peptide receptor 3                                                           | Stat2       | 516.539366 | 219.0429329 | -2.0206629 | 6.1262E-08 |
| leucine rich adaptor protein 1-like                                                         | Rxfp3       | 66.2254858 | 25.48563631 | -2.0218288 | 4.0325E-06 |
| complement receptor 2                                                                       | Lurap1l     | 7727.90395 | 3572.800699 | -2.0245457 | 2.4103E-14 |
| histocompatibility 2, M region locus 9                                                      | Cr2         | 51.2716247 | 16.32053798 | -2.025147  | 3.9435E-05 |
| 2'-5' oligoadenylate synthetase-like 2                                                      | H2-M9       | 58.8530583 | 21.06952806 | -2.0274305 | 1.2697E-05 |
| solute carrier family 5 (choline transporter), member 7                                     | Oasl2       | 148.893523 | 59.46124755 | -2.0302615 | 7.2023E-07 |
| collagen, type XIX, alpha 1                                                                 | Slc5a7      | 1077.10637 | 504.8016549 | -2.0304789 | 3.6236E-20 |
| Fc receptor-like 5, scavenger receptor                                                      | Col19a1     | 154.72298  | 63.32499166 | -2.039001  | 3.6006E-08 |
| regulator of G-protein signaling 17                                                         | Fcrls       | 28.9465242 | 2.456358016 | -2.0406097 | 1.0841E-05 |
| poly (ADP-ribose) polymerase family, member 10                                              | Rgs17       | 556.418868 | 257.8992665 | -2.0423032 | 5.1789E-22 |
| predicted gene 11627                                                                        | Parp10      | 250.856358 | 110.1328546 | -2.0490297 | 2.2967E-11 |
| H6 homeobox 1                                                                               | Gm11627     | 59.9310741 | 22.46576914 | -2.0511706 | 4.3037E-06 |
| growth arrest specific 6                                                                    | Hmx1        | 27.3318114 | 4.585264129 | -2.0546842 | 3.0596E-05 |
| ubiquitin-like modifier activating enzyme 7                                                 | Gas6        | 12192.2078 | 5621.318529 | -2.0577779 | 1.5017E-18 |
| 3-hydroxyacyl-CoA dehydratase 4                                                             | Uba7        | 154.134888 | 55.44497327 | -2.0589803 | 2.7643E-06 |
| solute carrier family 9 (sodium/hydrogen exchanger), member 2                               | Hacd4       | 1220.58051 | 576.6124299 | -2.0594458 | 9.2351E-36 |
| calponin 1                                                                                  | Slc9a2      | 121.430937 | 48.14517182 | -2.059999  | 2.4887E-07 |
| potassium inwardly-rectifying channel, subfamily J, member 15                               | Cnn1        | 23237.2368 | 10540.96748 | -2.0650551 | 1.2391E-15 |
| hydroxyprostaglandin dehydrogenase 15 (NAD)                                                 | Kcnj15      | 543.67994  | 250.4940698 | -2.0674358 | 1.1015E-19 |
| gap junction protein, alpha 5                                                               | Hpgd        | 17.2290868 | 1.801337024 | -2.0685058 | 1.6288E-05 |
| membrane bound O-acyltransferase domain containing 2                                        | Gja5        | 31.103744  | 6.109006919 | -2.0738783 | 2.5653E-05 |
| interferon induced transmembrane protein 1                                                  | Mboat2      | 1141.56361 | 531.7237451 | -2.074678  | 2.1215E-24 |
| vanin 1                                                                                     | Ifitm1      | 56.5303805 | 17.98304468 | -2.0757661 | 1.1737E-05 |
| SLAM family member 9                                                                        | Vnn1        | 90.6256712 | 36.87086744 | -2.075802  | 2.5404E-07 |
| sialic acid binding Ig-like lectin G                                                        | Slamf9      | 96.3751996 | 35.03607974 | -2.0764284 | 2.3923E-06 |
| leucine zipper, putative tumor suppressor 1                                                 | Siglecg     | 3279.74261 | 1524.628809 | -2.0765181 | 1.3713E-28 |
| urotensin 2B                                                                                | Lzts1       | 33.0082399 | 8.104747016 | -2.0817596 | 2.7369E-05 |
| colony stimulating factor 1 receptor                                                        | Uts2b       | 30.9775517 | 5.398581139 | -2.0846884 | 2.4183E-05 |
| coiled-coil domain containing 109B                                                          | Csf1r       | 155.474493 | 65.83160968 | -2.0869723 | 5.703E-11  |
| discs, large homolog 2 (Drosophila)                                                         | Cdccl109b   | 1763.40645 | 792.9085818 | -2.0929763 | 2.2324E-17 |
| proteasome (prosome, macropain) subunit, beta type 9 (large multifunctional peptidase 2)    | Dlg2        | 35.3287111 | 9.350895571 | -2.1043066 | 1.866E-05  |
| proteasome (prosome, macropain) subunit, beta type 8 (large multifunctional peptidase 7)    | Psmb9       | 33.171661  | 7.333201368 | -2.105112  | 2.0232E-05 |
| neuronatin                                                                                  | Psmb8       | 209.201646 | 91.25572378 | -2.1095918 | 1.3462E-12 |
| growth arrest and DNA-damage-inducible 45 beta                                              | Nnat        | 410.077514 | 188.4459194 | -2.1108308 | 8.412E-24  |
| hematopoietic cell specific Lyn substrate 1                                                 | Gadd45b     | 1999.75717 | 885.6799464 | -2.1109689 | 9.5866E-17 |
| solute carrier family 16 (monocarboxylic acid transporters), member 4                       | Hcls1       | 26.1716606 | 3.602674048 | -2.1130477 | 1.2698E-05 |
| late cornified envelope 1G                                                                  | Slc16a4     | 231.979611 | 93.74835681 | -2.114531  | 9.7551E-09 |
| serine (or cysteine) peptidase inhibitor, clade B, member 9                                 | Lce1g       | 126.35704  | 48.53386077 | -2.1158553 | 3.6006E-08 |
| phospholipid phosphatase 1                                                                  | Serpib9     | 977.128334 | 425.5520959 | -2.1198575 | 5.5114E-15 |
| integrin alpha M                                                                            | Plpp1       | 16317.5589 | 7372.631142 | -2.1305622 | 7.8599E-28 |
| 5-hydroxytryptamine (serotonin) receptor 7                                                  | Itgam       | 29.9068736 | 5.415222501 | -2.1308098 | 1.2918E-05 |
| Fas (TNF receptor superfamily member 6)                                                     | Htr7        | 169.018404 | 67.09710674 | -2.1314889 | 6.3519E-09 |
| myosin IF                                                                                   | Fas         | 347.992993 | 149.2047095 | -2.1349609 | 1.0588E-12 |
| RIKEN cDNA E030030106 gene                                                                  | Myo1f       | 21.7004586 | 2.539666365 | -2.1361889 | 5.2877E-06 |
| tubulin polymerization-promoting protein family member 3                                    | E030030106R | 16.693578  | 0.979816521 | -2.1382339 | 6.5647E-06 |
| DEAD (Asp-Glu-Ala-Asp) box polypeptide 58                                                   | Tppp3       | 961.243135 | 426.380101  | -2.140408  | 2.7853E-21 |
| sulfotransferase family 4A, member 1                                                        | Ddx58       | 1695.45791 | 756.1395665 | -2.1454868 | 6.6648E-27 |
| microtubule associated tumor suppressor candidate 2                                         | Sult4a1     | 312.441789 | 134.6661757 | -2.147663  | 8.6022E-17 |
| podocan-like 1                                                                              | Mtus2       | 104.617655 | 40.77638292 | -2.1646201 | 4.5105E-09 |
| interferon, alpha-inducible protein 27 like 2B                                              | Podn1       | 590.055731 | 252.3144858 | -2.1672797 | 1.2074E-16 |
| vomeroneasal 2, receptor 79                                                                 | Ifi2712b    | 1080.6444  | 455.7242859 | -2.1725355 | 7.5655E-15 |
| nucleoporin 62 C-terminal like                                                              | Vmn2r79     | 39.5989236 | 6.977845905 | -2.183698  | 3.7274E-06 |
| CD40 antigen                                                                                | Nup62cl     | 1177.71357 | 487.4879327 | -2.1854531 | 1.1448E-13 |
| R-spondin 3                                                                                 | Cd40        | 404.591682 | 172.2584967 | -2.1871379 | 1.694E-19  |
| serine (or cysteine) peptidase inhibitor, clade B, member 9e                                | Rspo3       | 326.862857 | 138.0132603 | -2.1873311 | 1.57E-16   |
| cannabinoid receptor 1 (brain)                                                              | Serpib9e    | 35.2836353 | 5.900970421 | -2.1936269 | 4.9005E-06 |
| GLI pathogenesis-related 1 (glioma)                                                         | Cnr1        | 233.5057   | 95.69689561 | -2.1955099 | 8.7026E-14 |
| G protein-coupled receptor 1                                                                | Glipr1      | 2326.70834 | 981.1081857 | -2.2002966 | 4.948E-18  |
| heat shock protein 1B                                                                       | Gpr1        | 242.399464 | 92.85191506 | -2.2162355 | 1.1631E-10 |
| mannosidase, beta A, lysosomal                                                              | Hspa1b      | 777.396344 | 336.4784954 | -2.2243304 | 1.4712E-33 |
| Rho guanine nucleotide exchange factor (GEF) 28                                             | Manba       | 652.632213 | 278.899354  | -2.2280622 | 1.1002E-29 |
| leucine rich repeat containing 17                                                           | Arhgef28    | 5442.99473 | 2368.910884 | -2.2282216 | 7.842E-40  |
| TNNI3 interacting kinase                                                                    | Lrrc17      | 5204.48312 | 2188.569634 | -2.2405089 | 5.2665E-23 |
| stabilin 1                                                                                  | Tnni3k      | 129.220697 | 46.11655133 | -2.2423737 | 1.0581E-08 |
| X-prolyl aminopeptidase (aminopeptidase P) 2, membrane-bound                                | Stab1       | 68.7845148 | 16.2593517  | -2.2650219 | 1.4641E-06 |
| testis development related protein                                                          | Xpnpep2     | 74.384279  | 23.16220994 | -2.2693074 | 3.8133E-07 |
| radical S-adenosyl methionine domain containing 2                                           | Tdrp        | 268.371493 | 103.215777  | -2.2741044 | 2.4131E-13 |
| fibronectin type III domain containing 5                                                    | Rsad2       | 578.391987 | 221.7490324 | -2.2923461 | 1.7109E-13 |
| LIM and senescent cell antigen like domains 2                                               | Fndc5       | 79.8001367 | 20.47851769 | -2.2938709 | 7.686E-07  |
| receptor transporter protein 4                                                              | Lims2       | 1166.22946 | 471.6642876 | -2.2998673 | 5.9004E-23 |
| schlafen 2                                                                                  | Rtp4        | 170.584947 | 58.25397961 | -2.3013025 | 9.1413E-10 |
| coronin, actin binding protein 1A                                                           | Slfn2       | 222.116803 | 80.63089328 | -2.303594  | 5.1297E-11 |
| interferon regulatory factor 9                                                              | Coro1a      | 109.467774 | 36.53237207 | -2.3170559 | 1.1157E-08 |
| membrane-spanning 4-domains, subfamily A, member 6D                                         | Irf9        | 1013.01507 | 396.1726594 | -2.3173809 | 1.0639E-17 |
|                                                                                             | Ms4a6d      | 39.2208561 | 8.035306467 | -2.3186152 | 1.0627E-06 |

|                                                                       |           |            |             |            |            |
|-----------------------------------------------------------------------|-----------|------------|-------------|------------|------------|
| leukocyte immunoglobulin-like receptor, subfamily B, member 4A        | Lilrb4a   | 25.9261046 | 1.595956898 | -2.3240116 | 3.2346E-07 |
| fatty acid binding protein 7, brain                                   | Fabp7     | 140.567065 | 49.29708574 | -2.3340211 | 6.0849E-11 |
| interferon induced protein with tetratricopeptide repeats 1B like 2   | Ifit1bl2  | 61.2915354 | 15.08524929 | -2.34252   | 3.0195E-07 |
| CD36 antigen                                                          | Cd36      | 21.536698  | 2.00949071  | -2.3493454 | 3.5012E-07 |
| basal cell adhesion molecule                                          | Bcam      | 129.67509  | 46.92958319 | -2.3529653 | 8.0525E-13 |
| myosin VIIA                                                           | Myo7a     | 424.88928  | 153.7035558 | -2.3544743 | 1.1509E-12 |
| adhesion G protein-coupled receptor A1                                | Adgra1    | 96.8297617 | 28.12744001 | -2.3650885 | 2.7182E-08 |
| collagen, type VIII, alpha 2                                          | Col8a2    | 685.604242 | 275.204883  | -2.3775632 | 1.069E-37  |
| immunity-related GTPase family M member 1                             | Irgm1     | 3314.20491 | 1323.852711 | -2.3924187 | 5.2874E-38 |
| popeye domain containing 2                                            | Popdc2    | 218.848451 | 81.62469479 | -2.4026294 | 2.4129E-16 |
| isochorismatase domain containing 2b                                  | Isoc2b    | 37.1963175 | 9.264930849 | -2.4046983 | 9.4691E-08 |
| guanylate binding protein 3                                           | Gbp3      | 203.734903 | 70.99078971 | -2.4111277 | 1.4109E-12 |
| tripartite motif-containing 34A                                       | Trim34a   | 63.3314282 | 15.38785634 | -2.4148749 | 1.4222E-07 |
| lipase, member O2                                                     | Lipo2     | 138.035551 | 45.84710982 | -2.4153821 | 1.4312E-11 |
| membrane-spanning 4-domains, subfamily A, member 6C                   | Ms4a6c    | 21.9909206 | 0.494068601 | -2.4236048 | 1.945E-08  |
| monoacylglycerol O-acyltransferase 2                                  | Mogat2    | 382.644819 | 142.2131286 | -2.4717491 | 3.0321E-23 |
| cDNA sequence BC025446                                                | BC025446  | 28.744686  | 3.197460917 | -2.5175598 | 4.2501E-08 |
| V-set immunoregulatory receptor                                       | Vsir      | 428.620289 | 158.830207  | -2.5191874 | 3.8613E-29 |
| myomesin 2                                                            | Myom2     | 153.979653 | 46.06109577 | -2.5328666 | 2.2815E-11 |
| C1q and tumor necrosis factor related protein 3                       | C1qtnf3   | 14233.5801 | 5025.291081 | -2.5510381 | 1.3193E-21 |
| toll-like receptor 13                                                 | Tlr13     | 33.3801578 | 3.491696513 | -2.5645345 | 2.5013E-08 |
| tumor protein D52-like 1                                              | Tpd52l1   | 396.10367  | 141.8797116 | -2.5600299 | 1.0185E-26 |
| neurocalcin delta                                                     | Ncald     | 481.119015 | 168.480936  | -2.5621635 | 6.8179E-23 |
| activating transcription factor 3                                     | Atf3      | 479.706989 | 168.8697578 | -2.5732914 | 2.9985E-26 |
| C-type lectin domain family 5, member a                               | Clec5a    | 24.7649355 | 0.738329341 | -2.5785365 | 1.8876E-09 |
| testis expressed gene 15                                              | Tex15     | 674.60122  | 241.1993993 | -2.5824382 | 1.2958E-27 |
| macrophage scavenger receptor 1                                       | Msr1      | 82.1299824 | 17.98038831 | -2.5841827 | 6.8423E-09 |
| cell migration inducing protein, hyaluronan binding                   | Cemip     | 3938.67541 | 1386.596372 | -2.5977894 | 3.6703E-26 |
| serine/threonine kinase 26                                            | Stk26     | 169.936902 | 53.66883267 | -2.6352547 | 3.9789E-15 |
| ribonuclease T2B                                                      | Rnaset2b  | 64.4920881 | 14.50798953 | -2.6520134 | 3.4545E-09 |
| aminoadipate-semialdehyde synthase                                    | Aass      | 142.75778  | 41.3646705  | -2.6613747 | 2.3247E-13 |
| guanylate binding protein 7                                           | Gbp7      | 370.466121 | 123.1087299 | -2.6857061 | 5.7901E-25 |
| regulator of G-protein signaling 4                                    | Rgs4      | 4211.73911 | 1468.210273 | -2.6950705 | 5.334E-40  |
| ribosomal protein L34                                                 | Rpl34     | 1239.37663 | 195.9066733 | -2.7009456 | 4.3832E-09 |
| ribosomal protein L34, pseudogene 1                                   | Rpl34-ps1 | 1239.37663 | 195.9066733 | -2.7009456 | 4.3832E-09 |
| predicted gene 4705                                                   | Gm4705    | 1239.37663 | 195.9066733 | -2.7009456 | 4.3832E-09 |
| C-type lectin domain family 4, member n                               | Clec4n    | 24.311901  | 1.104661858 | -2.7187284 | 1.6862E-09 |
| cell adhesion molecule 1                                              | Cadm1     | 176.891997 | 54.17397986 | -2.7342009 | 1.9571E-17 |
| immunity-related GTPase family M member 2                             | Irgm2     | 186.244906 | 52.80559157 | -2.7866105 | 2.6609E-16 |
| poly (ADP-ribose) polymerase family, member 9                         | Parp9     | 1074.79941 | 351.7998527 | -2.7900025 | 4.7634E-34 |
| MX dynamin-like GTPase 2                                              | Mx2       | 75.8284028 | 14.63838199 | -2.8039933 | 1.1856E-10 |
| chemokine (C-C motif) ligand 9                                        | Ccl9      | 157.866027 | 36.14657386 | -2.8120922 | 1.395E-11  |
| tubulin polymerization promoting protein                              | Tppp      | 102.669951 | 26.95940424 | -2.8336009 | 2.3816E-14 |
| monooxygenase, DBH-like 1                                             | Moxd1     | 2066.86929 | 702.783185  | -2.864394  | 4.4897E-97 |
| cytidine monophosphate (UMP-CMP) kinase 2, mitochondrial              | Cmpk2     | 213.873498 | 61.46241758 | -2.8875887 | 1.0789E-20 |
| TYRO protein tyrosine kinase binding protein                          | Tyrobp    | 45.0157997 | 2.056692005 | -2.8913393 | 1.211E-10  |
| matrix metalloproteinase 12                                           | Mmp12     | 73.0535392 | 5.118330533 | -3.0086281 | 3.7734E-11 |
| cytochrome P450, family 4, subfamily a, polypeptide 12B               | Cyp4a12b  | 249.648925 | 67.34686383 | -3.1134707 | 2.7041E-27 |
| chemokine (C-X3-C motif) receptor 1                                   | Cx3cr1    | 74.0067207 | 12.43171464 | -3.1206534 | 5.1736E-13 |
| lymphocyte cytosolic protein 1                                        | Lcp1      | 110.70374  | 23.8922186  | -3.26211   | 2.4796E-18 |
| interferon gamma induced GTPase                                       | Igtp      | 211.828135 | 44.72298227 | -3.264545  | 6.5627E-18 |
| cytochrome b-245, beta polypeptide                                    | Cybb      | 58.2279072 | 5.170961761 | -3.2706961 | 1.0077E-12 |
| XIAP associated factor 1                                              | Xaf1      | 277.225443 | 52.98861526 | -3.271451  | 6.0366E-16 |
| adhesion G protein-coupled receptor E1                                | Adgre1    | 48.4593625 | 5.123760465 | -3.2875253 | 6.7451E-13 |
| complement component 1, q subcomponent, beta polypeptide              | C1qb      | 53.7119689 | 4.998915129 | -3.3258967 | 3.1413E-13 |
| OTU domain containing 7A                                              | Otud7a    | 398.537016 | 104.8369304 | -3.3393484 | 1.2395E-40 |
| membrane-spanning 4-domains, subfamily A, member 7                    | Ms4a7     | 29.9055157 | 0.449640866 | -3.3779466 | 4.1648E-14 |
| processing of precursor 4, ribonuclease P/MRP family, (S. cerevisiae) | Pop4      | 2438.43211 | 678.2621733 | -3.3798818 | 7.3365E-73 |
| family with sequence similarity 181, member B                         | Fam181b   | 140.393082 | 25.12727291 | -3.5182639 | 9.5681E-18 |
| interferon regulatory factor 7                                        | Irf7      | 291.734456 | 66.12520856 | -3.6284693 | 1.0514E-34 |
| guanylate binding protein 2                                           | Gbp2      | 575.172315 | 117.2472768 | -3.7887929 | 1.4663E-28 |
| complement component 1, q subcomponent, alpha polypeptide             | C1qa      | 96.0403408 | 7.260870072 | -3.8934177 | 7.1565E-17 |
| ATPase, H+ transporting, lysosomal V0 subunit C                       | Atp6v0c   | 339.649275 | 64.47130769 | -3.9612336 | 6.6604E-29 |
| macrophage expressed gene 1                                           | Mpeg1     | 142.382428 | 20.30606872 | -4.0230683 | 3.1362E-22 |
| complement component 1, q subcomponent, C chain                       | C1qc      | 78.6027571 | 6.639299762 | -4.2522126 | 5.5718E-20 |
| ribosomal protein S18                                                 | Rps18     | 1824.50163 | 345.4474561 | -4.549037  | 4.5249E-60 |
| ubiquitin specific peptidase 18                                       | Usp18     | 314.747545 | 44.34548909 | -4.6637025 | 1.621E-32  |
| spermatogenesis associated glutamate (E)-rich protein 3               | Speer3    | 53.5482083 | 0           | -5.2288727 | 1.2378E-24 |
| tripartite motif-containing 30A                                       | Trim30a   | 62.3710788 | 0.693901606 | -5.98552   | 8.3679E-29 |
| histocompatibility 2, T region locus 23                               | H2-T23    | 302.049111 | 35.03601332 | -6.1190391 | 1.9691E-51 |
| cathepsin S                                                           | Ctss      | 108.592105 | 6.84178914  | -6.3988109 | 3.8871E-38 |
| lysozyme 2                                                            | Lyz2      | 640.693301 | 65.33199395 | -7.1067361 | 1.6143E-74 |
| interferon-induced protein 44                                         | Ifi44     | 454.625564 | 26.78418172 | -8.3869943 | 4.2967E-53 |
| ribosomal protein S2                                                  | Rps2      | 4790.88714 | 443.3232484 | -9.4032585 | 6.888E-197 |
| histocompatibility 2, T region locus 22                               | H2-T22    | 1002.51961 | 68.02135051 | -12.304463 | 4.221E-205 |
| histocompatibility 2, T region locus 9                                | H2-T9     | 1002.51961 | 68.02135051 | -12.304463 | 4.221E-205 |
| tripartite motif-containing 30D                                       | Trim30d   | 149.791915 | 0           | -13.352236 | 5.0447E-61 |
| tripartite motif-containing 12A                                       | Trim12a   | 207.539651 | 0.24426074  | -21.544905 | 8.2444E-89 |

**Table S3: Significantly regulated by the combination of MYC and KRas<sup>G12D</sup> in MEFs**

Table shows RNA-SEQ reads for each gene significantly regulated by more than 2 fold upon combined activation of Rosa26<sup>DM-lsl-MYC</sup> and lsl-KRas<sup>G12D</sup> alleles for 24hrs in primary MEFs. Comparison is with identically treated passage-matched wild-type MEFs. FC = fold change, numbers >2 in red; <-2 in dark blue. Adjusted p values <0.05 shown in red.

**Table S4: Significantly regulated by MYC or Miz1 depletion in KMC PDAC cells**

Mean RNA-SEQ values for expressed genes in KMC cells, with and without siRNA depletion of MYC or Miz1, filtered for genes significantly regulated by MYC depletion. Fold change and Adjusted P values for siMYC and siMiz1, relative to control siRNA-treated KMC cells, shown.

## SUPPLEMENTARY METHODS

### RNA-SEQ analysis

Pancreatic tumours were removed from euthanised subject animals and dissected into 3-5mm fragments to remove all extraneous (eg. normal, gut or lymph node) tissue. Total RNA was isolated using the RNEasy Mini Kit (Qiagen) according to manufacturer's protocol and DNA was depleted with the RNase-Free DNase Set (Qiagen). Quality of the purified RNA was tested on an Agilent 2200 TapeStation using RNA screentape. For analysis of MEF gene expression, libraries were prepared using the TruSeq stranded totalRNA with RiboZero kit (Illumina). For analysis of bulk tumour gene expression, cDNA libraries were prepared as previously (2), using Illumina TruSeq Stranded mRNA LT Kit. Quality and quantity of the cDNA libraries was assessed on an Agilent 2200 TapeStation (D1000 screentape) and Qubit (Thermo Fisher Scientific) respectively. Libraries were run on an Illumina NextSeq500 using the High Output 75 cycles kit (2x36 cycles, paired end reads, single index). Quality checks on the raw RNA-Seq data files were done using FastQC (3) and Fastq Screen (4). Alignment of the RNA-Seq paired-end reads was to the GRCm38 (5) version of the mouse genome and annotation using HiSat2 (6) and TopHat (7). Expression levels were determined and statistically analysed by a workflow combining HTSeq (8), the R environment (9), utilising packages from the Bioconductor data analysis suite (10) and differential gene expression analysis based on the negative binomial distribution using the DESeq2 package (11). Further data analysis and visualisation used R and Bioconductor packages. Pathway modulation analysis was performed using Metacore GeneGO (12). Gene-set enrichment for PDAC subtype gene signatures was performed on the converted mouse identifiers using the 'GSVA' package (13). PDAC subtype gene signatures are as defined in Bailey et al. (1).

Software Versions for pancreatic tumour analysis:

FastQC version 0.11.7; Fastq Screen version 0.12.0; GRCm38.93 version of the mouse genome and annotation; HiSat2 version 2.1.0; HTSeq version 0.9.1; R environment version 3.4.4

Software Versions for KC pancreatic tumours:

GRCm38.75 version of the mouse genome and annotation; TopHat run version 2.0.13

Software Versions for MEF experiments:

GRCm38.75 version of the mouse genome and annotation; TopHat run version 2.0.13; Bowtie version

2.2.4.0; R environment version 3.3.2

## **RT-PCR**

RNA was isolated using TRIZOL (Invitrogen) method according to manufacturer's directions. Quantitect reverse transcription kit (Qiagen 205313) was used for cDNA synthesis followed by real time PCR using SYBR Green method (VWR QUNT95072). Gusb and ACTIN were used for data normalization in mouse and human samples respectively. The following primer sets were used to detect indicated mRNA transcripts:

### ***Mouse***

Gusb F: cacttcgaccacacctagag, R: accgcagggtgattttgt

Irf5 F: tacgaggtctgctccaacg, R: gcctggtagcattctctgga

Irf7 F: cttcagcactttctccgaga, R: tgtagtgggtgacccttgc

Ifi44 F: cacacgtggatagcctggat, R: ggcaaaaccaaagactccat

Ifnb1 F: aactccaccagcagacagt, R: agtggagagcagttgaagac

Myc F: cgcgtccgagtgattga, R: agcagcagtgccaggaa

Miz1 F: tctgtggtggggttcggac, R: ctgctccaagacacgctggc

Cxc13 F: tcacacatataactttctcatcttg, R: catagatcggattcaagttacgc

### ***Human***

Actin F: ccaaccgcgagaagatga, R: ccagaggcgtacaggatag

IRF5 F: cacactccagcccacttc, R: gcatctgcacctggaagg

IRF7 F: ctgcagtcacacctgtagcc, R: gtggactgagggtttagc

IFI44 F: agcctgtgaggtccaagcta, R: gcagaaagaattagaacatcctttaca

IFNB1 f: gacgccgattgaccatcta, R: agccaggaggttctcaacaat

Myc F : gccctggtgctccatga, R: caacatcgatttctctcatcttct



## SUPPLEMENTARY REFERENCES

1. Bailey P, Chang DK, Nones K, Johns AL, Patch AM, Gingras MC, et al. Genomic analyses identify molecular subtypes of pancreatic cancer. *Nature*. 2016;531(7592):47-52.
2. Fisher S, Barry A, Abreu J, Minie B, Nolan J, Delorey TM, et al. A scalable, fully automated process for construction of sequence-ready human exome targeted capture libraries. *Genome Biol*. 2011;12(1):R1.
3. S. A. FastQC: a quality control tool for high throughput sequence data. 2018.
4. Wingett S. FastQ Screen. 2018.
5. Zerbino DR, Achuthan P, Akanni W, Amode MR, Barrell D, Bhai J, et al. Ensembl 2018. *Nucleic Acids Res*. 2018;46(D1):D754-D61.
6. Kim D, Langmead B, Salzberg SL. HISAT: a fast spliced aligner with low memory requirements. *Nat Methods*. 2015;12(4):357-60.
7. Trapnell C, Pachter L, Salzberg SL. TopHat: discovering splice junctions with RNA-Seq. *Bioinformatics*. 2009;25(9):1105-11.
8. Anders S, Pyl PT, Huber W. HTSeq--a Python framework to work with high-throughput sequencing data. *Bioinformatics*. 2015;31(2):166-9.
9. R Core Team RFFSC, Vienna, Austria. . A language and environment for statistical computing. 2018.
10. Huber W, Carey VJ, Gentleman R, Anders S, Carlson M, Carvalho BS, et al. Orchestrating high-throughput genomic analysis with Bioconductor. *Nat Methods*. 2015;12(2):115-21.
11. Love MI, Huber W, Anders S. Moderated estimation of fold change and dispersion for RNA-seq data with DESeq2. *Genome Biol*. 2014;15(12):550.
12. Analytics C. Metacore.
13. Hanzelmann S, Castelo R, Guinney J. GSEA: gene set variation analysis for microarray and RNA-seq data. *BMC Bioinformatics*. 2013;14:7.
